# Supplementary material for: Characterization of cannabinoid plasma concentration, maternal health, and cytokine levels in a rat model of prenatal Cannabis smoke exposure
Source: Sci Rep. 2023 Nov 29;13:21070. doi: 10.1038/s41598-023-47861-8 (PMC10687022; doi:10.1038/s41598-023-47861-8)
Supplement: Supplementary file 1 — Supplementary Information. [file 41598_2023_47861_MOESM1_ESM.docx]

**Supplemental Information for:** Characterization of cannabinoid plasma concentration, maternal health, and cytokine levels in a rat model of prenatal *Cannabis* smoke exposure

Tallan Black1,2, Sarah L. Baccetto1,2, Ilne L. Barnard2, Emma Finch2, Dan L. McElroy2, Faith V. L. Austin-Scott2, Quentin Greba2, Deborah Michel1, Ayat Zagzoog1, John G. Howland2,*, Robert B. Laprairie1,3,*.

Abbreviated title: Rat prenatal *Cannabis* smoke exposure

1College of Pharmacy and Nutrition, University of Saskatchewan, Saskatoon SK Canada

2Department of Anatomy, Physiology, and Pharmacology, College of Medicine, University of Saskatchewan, Saskatoon SK Canada

3Department of Pharmacology, College of Medicine, Dalhousie University, Halifax NS Canada


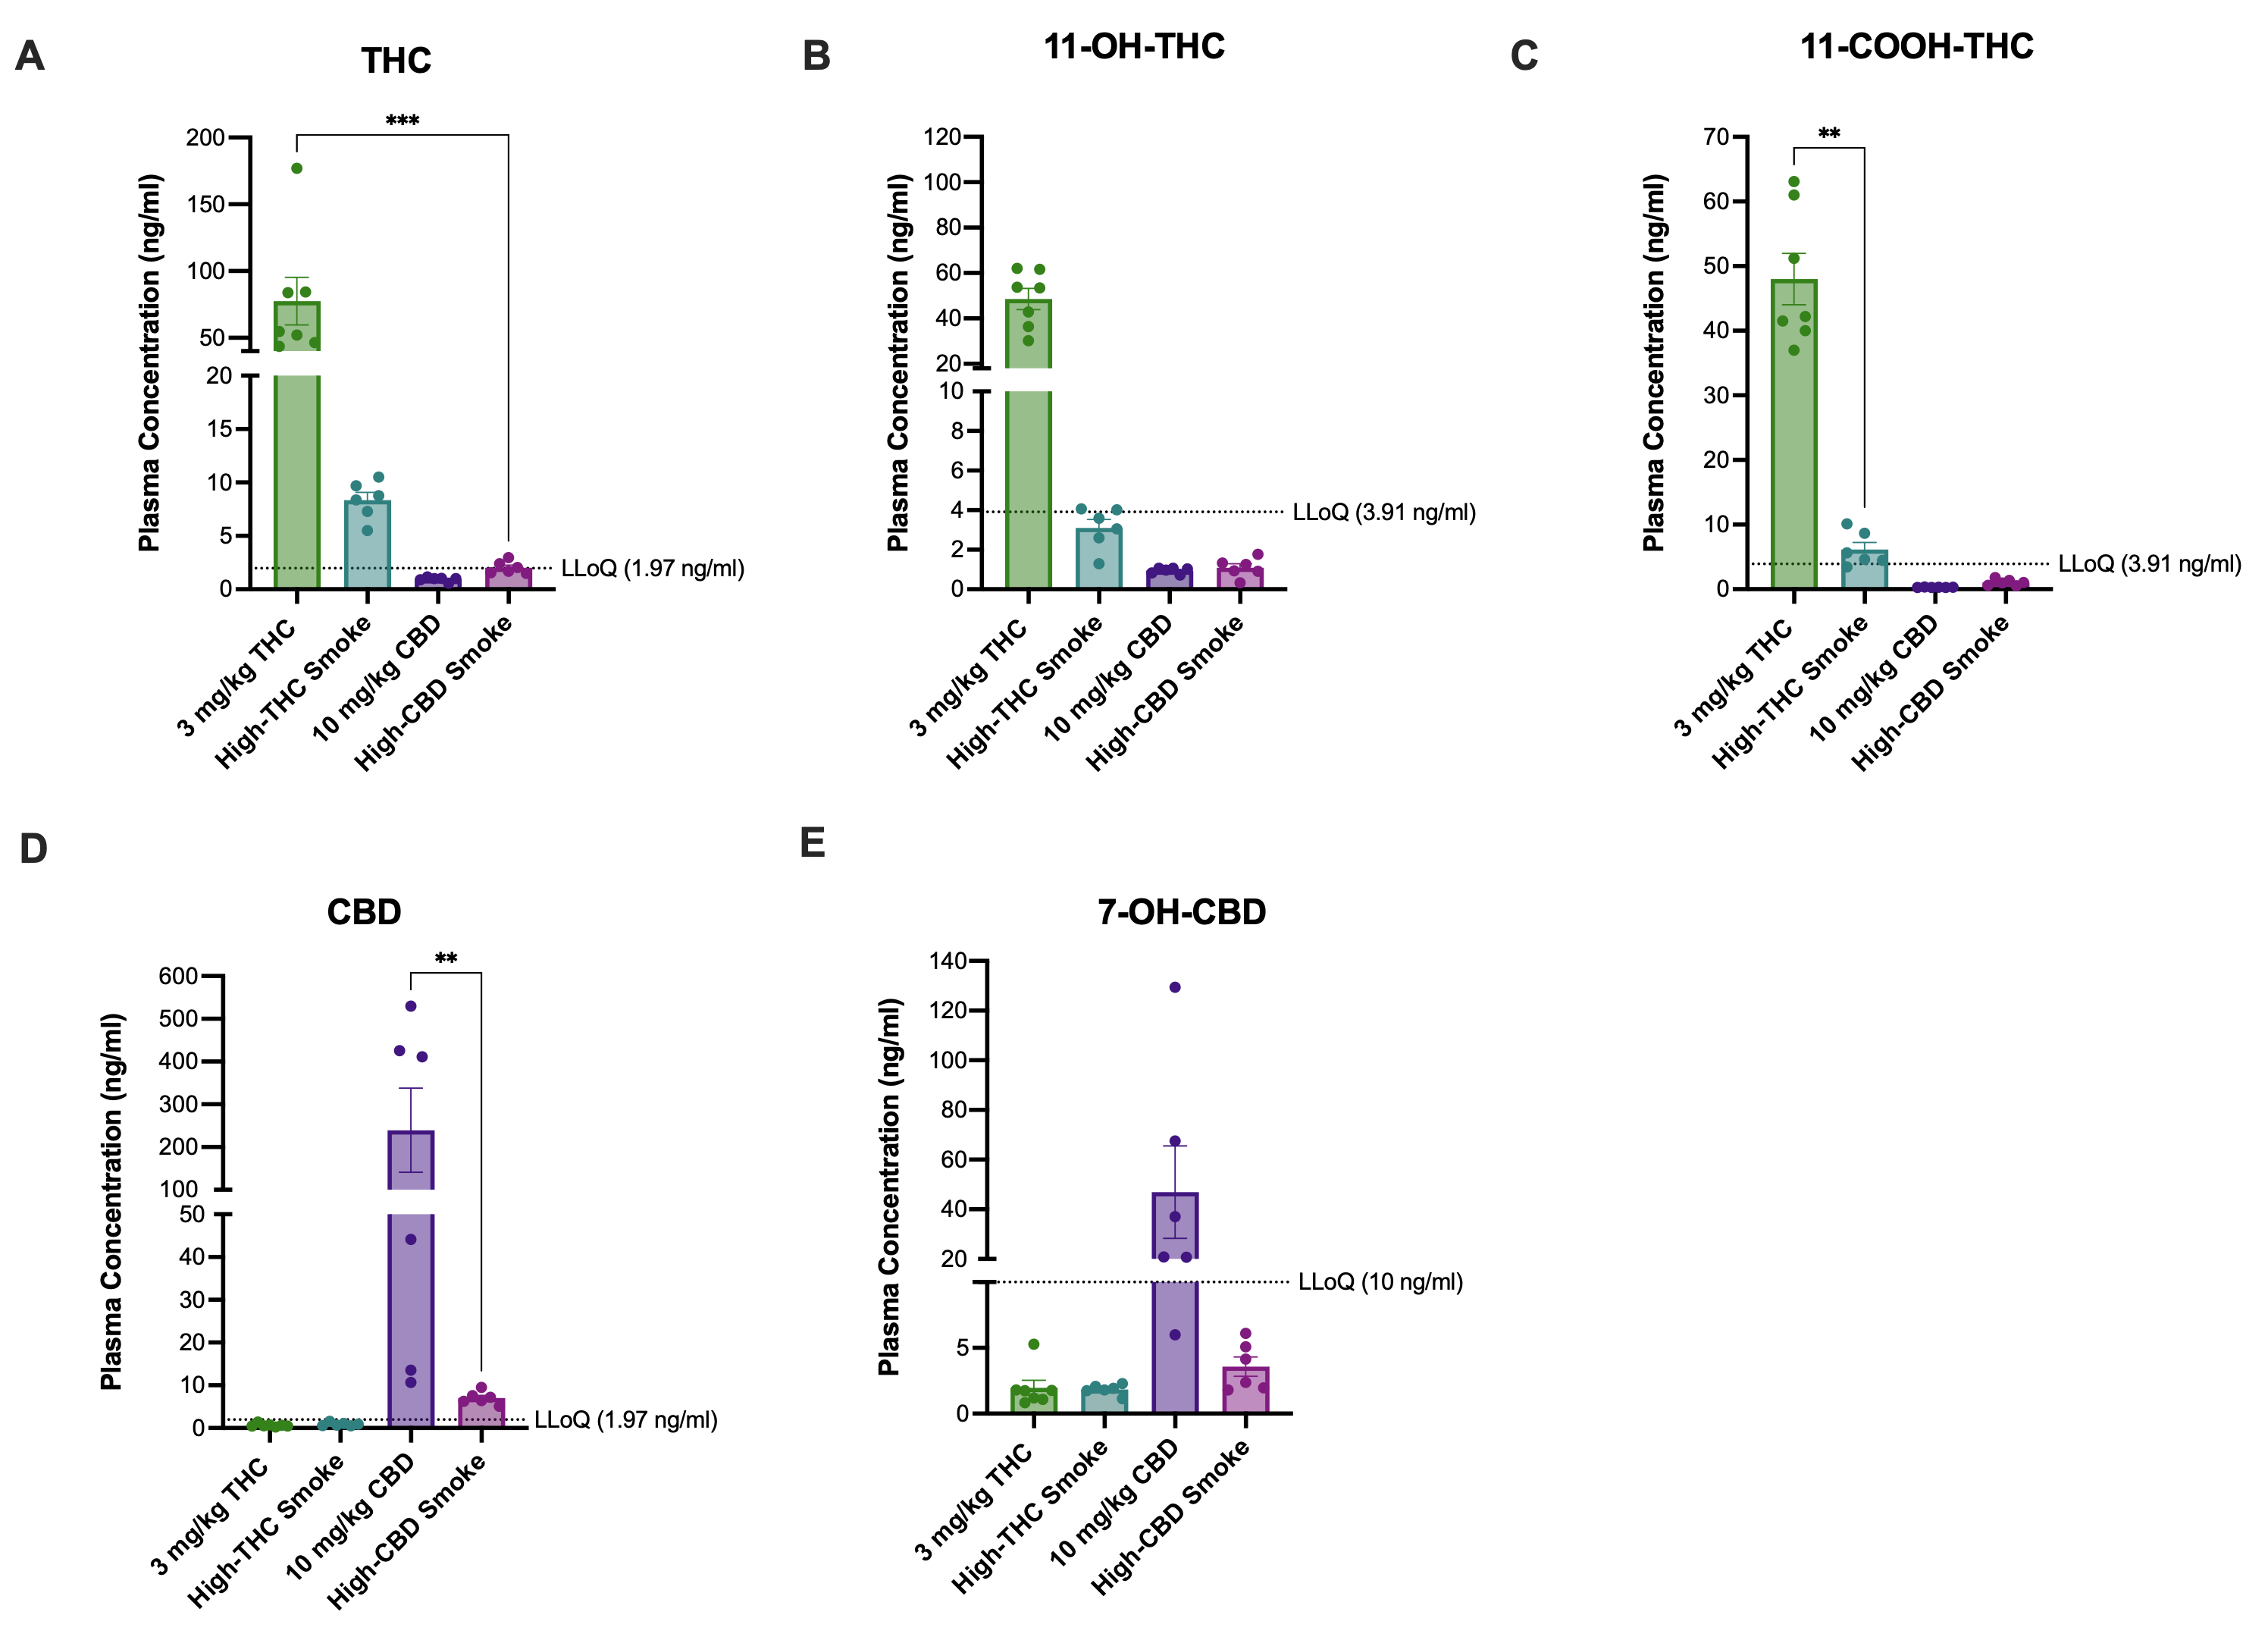


**Figure S1.** Comparison of THC, CBD, and metabolite levels among treatments in maternal plasma on GD6 after a single exposure to either 3 mg/kg/d THC *i.p.*, high THC smoke, 10 mg/kg/d CBD *i.p.*, or high CBD smoke.Mean maternal plasma concentrations of **(A)** THC, **(B)** 11-OH-THC, **(C)** 11-COOH-THC, **(D)** CBD, and **(E)** 7-OH-CBD. All samples were collected on GD6, 30 minutes following one treatment**.** Note the different scaling of the y-axes of the panels. Data are mean ± S.E.M. *n=*6-8 dams/treatment; *p<0.05, ** p<0.01, ***p<0.001 as determined by Kruskal-Wallis (KW) one-way ANOVA or Kolmogorov-Smirnov (KS) test.

| **Placenta** | | | |
| --- | --- | --- | --- |
| Cytokines and Chemokines | Statistical Analysis | | |
| Type | Test | F, H or W value | P value |
| EGF | Kruskal-Wallis | F (4,26) = 4.04 | **P=0.011*** |
| Eotaxin | ANOVA | F (4, 30) = 5.47 | **P=0.0020*** |
| Fracktalkine (CX3CL1) | ANOVA | F (4, 30) = 0.48 | P=0.74 |
| G-CSF | ANOVA | F (4, 30) = 3.32 | **P=0.023*** |
| GM-CSF | ANOVA | F (4, 29) = 0.39 | P=0.81 |
| GRO/KC (CXCL-1) | Kruskal-Wallis | H (4) =6.57 | P=0.16 |
| IFNy | Welch's | W(4.00, 13.05)=10.66 | **P=0.00050*** |
| IL-1α | Kruskal-Wallis | H (4) =20.72 | **P=0.00040*** |
| IL-1β | ANOVA | F (4, 29) = 13.08 | **P<0.00010*** |
| IL-2 | ANOVA | F (4, 30) = 1.69 | P=0.18 |
| IL-4 | Kruskal-Wallis | H (4) =12.46 | **P=0.014*** |
| IL-5 | ANOVA | F (4,30 ) = 1.88 | P=0.49 |
| IL-6 | ANOVA | F (4, 30) = 57.78 | **P<0.00020*** |
| IL-10 | ANOVA | F (4, 40) = 3.23 | **P=0.025*** |
| IL-12p70 | ANOVA | F (4, 30) = 1.66 | P=0.19 |
| IL-13 | ANOVA | F (4, 30) = 1.68 | P=0.18 |
| IL-17A | ANOVA | F (4, 30) = 14.03 | **P<0.00010*** |
| IL-18 | ANOVA | F (4, 30) = 1.49 | P=0.23 |
| IP-10 (CXCL10) | Kruskal-Wallis | H (4) = 12.3 | **P=0.015*** |
| Leptin | ANOVA | F (4, 30) = 0.51 | P=0.73 |
| LIX (CXCL5) | Welch's | W(4.00, 14.04)=5.16 | **P=0.047*** |
| MCP-1 (CCL-2) | Kruskal-Wallis | H (4) = 4.16 | P=0.39 |
| MIP-1α (CCL3) | Kruskal-Wallis | H (4) = 20.13 | **P=0.00050*** |
| MIP-2 (CXCL2) | ANOVA | F (4, 28) = 1.29 | P=0.30 |
| RANTES (CCL5) | ANOVA | F (4, 28) = 3.47 | **P=0.020*** |
| TNFα | ANOVA | F (4, 29) = 4.20 | **P=0.0083*** |
| VEGF | ANOVA | F (4, 30) = 1.73 | P=0.17 |

**Table S1.** Statistical analysis for placenta multiplex assay.

| **Combined Male and Female Fetal Brains** | | | |
| --- | --- | --- | --- |
| Cytokines and Chemokines | Statistical Analysis | | |
| Type | Test | F, H or W value | P value |
| EGF | Kruskal-Wallis | H (4) = 13.55 | **P=0.0089*** |
| Eotaxin | Welch's | W (4.000, 29.72)=1.635 | P=0.19 |
| Fracktalkine (CX3CL1) | Kruskal-Wallis | H (4) =1.59 | P=0.81 |
| G-CSF | ANOVA | F (4, 58)= 0.72 | P=0.58 |
| GM-CSF | Kruskal-Wallis | H (4) = 4.61 | P=0.33 |
| GRO/KC (CXCL-1) | Kruskal-Wallis | W (4.000, 26.85)=3.64 | P=0.021 |
| IFNy | ANOVA | F (4, 61) = 6.00 | **P=0.00040*** |
| IL-1α | ANOVA | F (4, 60) = 3.19 | **P=0.019*** |
| IL-1β | Welch's | (4.000, 27.14)=5.37 | **P=0.0026*** |
| IL-2 | ANOVA | F (4, 61) = 4.27 | **P=0.0041*** |
| IL-4 | ANOVA | F (4, 61) = 6.10 | **P=0.00030*** |
| IL-5 | ANOVA | F (4, 61) = 0.73 | P=0.57 |
| IL-6 | Welch's | W (4.00, 39.43)=9.13 | **P<0.00010*** |
| IL-10 | Kruskal-Wallis | H(4) = 21.26 | **P=0.0003*** |
| IL-12p70 | ANOVA | F (4, 61) = 0.62 | P=0.65 |
| IL-13 | ANOVA | F (4, 60) = 0.59 | P=0.67 |
| IL-17A | ANOVA | F (4, 61) = 3.71 | **P=0.0091*** |
| IL-18 | Welch's | W (4.00, 29.19)=4.84 | **P=0.0041*** |
| IP-10 (CXCL10) | Welch's | W (4.00, 40.52)=4.05 | **P=0.0075*** |
| Leptin | ANOVA | F (4, 61) = 0.57 | P=0.68 |
| LIX (CXCL5) | Welch's | W(4.00, 29.31)=3.61 | **P=0.017*** |
| MCP-1 (CCL-2) | Kruskal-Wallis | H (4) = 0.82 | P=0.93 |
| MIP-1α (CCL3) | Welch's | W (4.00, 30.24)=5.10 | **P=0.0029*** |
| MIP-2 (CXCL2) | Kruskal-Wallis | H (4) = 1.70 | P=0.79 |
| RANTES (CCL5) | Welch's | W (4.00, 29.92)=7.02 | **P=0.0015*** |
| TNFα | Welch's | W (4.00, 28.33)=6.84 | **P=0.00060*** |
| VEGF |  | F (4, 61) = 2.80 | **P=0.034*** |

**Table S2. Statistical analysis for male and female fetal brain multiplex assay.**
